# Supplementary material for: Solution-processed small molecules based on benzodithiophene and difluorobenzothiadiazole for inverted organic solar cells
Source: Royal Society of Chemistry journal article supplement (doi:10.1039/c5py01051a), 2015-01-01
Supplement: c5py01051a1.pdf [file c5py01051a1.pdf]

## Electronic Supplementary Information for: Solution-Processed Small Molecules Based on Benzodithiophene and Difluorobenzothiadiazole for Inverted Organic Solar Cells

Xunfan Liao<sup>a</sup>, Feiyan Wu<sup>a</sup>, Lie Chen<sup>\*a,b</sup>, Yiwang Chen<sup>a,b</sup>

<sup>a</sup>College of Chemistry/Institute of Polymers, Nanchang University, 999 Xuefu Avenue, Nanchang 330031, China

<sup>b</sup>Jiangxi Provincial Key Laboratory of New Energy Chemistry, Nanchang University, 999 Xuefu Avenue, Nanchang 330031, China

\*Corresponding author. Tel.: +86 791 83968703; fax: +86 791 83968830. E-mail: chenlie@ncu.edu.cn (L. Chen).

Xunfan Liao and Feiyan Wu contributed equally to this work.

### 1. Materials

All reactions and manipulations were operated under argon atmosphere and all the starting materials were purchased from commercial suppliers and used without further purification. Chloroform, Ag (99.999%), MoO<sub>3</sub> (99.999%), PC<sub>61</sub>BM (99.9%), PC<sub>71</sub>BM (99.9%) and other materials were purchased from Alfa, or Aldrich and without further purification. Indium-tin oxide (ITO) glass was purchased from Delta Technologies Limited, whereas PEDOT:PSS (Baytron PA14083) was obtained from Bayer Inc. 4,7-Bis(5-bromothiophene-2-yl)-5,6-difluorobenzo[c][1,2,5]thiadiazole (compound 2) and 4,7-bis(2-bromo-5-thien)-2,1,3-benzothiadiazole (compound 3) were purchased from Derthon. Tetrakis(triphenylphosphine)palladium(0) [Pd(PPh<sub>3</sub>)<sub>4</sub>] was obtained from Energy Chemical.

### 2. Experimental

The <sup>1</sup>H and <sup>13</sup>C NMR spectra were recorded in deuterated solvents on a Bruker ADVANCE 400 NMR Spectrometer. <sup>1</sup>H NMR chemical shifts were reported in ppm downfield from tetramethylsilane (TMS) reference using the residual protonated solvent as an internal standard. Thermogravimetric analysis (TGA) was carried out on a PerkinElmer TGA 7 instrument for thermal analysis at a heating rate of 10 °C/min under nitrogen. UV-vis absorption spectra were recorded on a Perkin Elmer Lambda 750 spectrophotometer. Cyclic voltammetry (CV) was performed a Zahner IM6e electrochemical workstation. X-ray diffraction (XRD) was performed on a Bruker D8 Focus X-ray diffractometer operating at 30 kV and 20 mA with a copper target ( $\lambda = 1.54 \text{ \AA}$ ) and at a scanning rate of 1°/min. Atomic force microscopic (AFM) images were carried on a Nanoscope III A (Digital Instruments) scanning probe microscope using the tapping mode. The specimen for AFM measurement was prepared as same as the devices fabrication other than without MoO<sub>3</sub>/Ag was vacuum evaporated on the active layer. Transmission electron microscopy (TEM) images were performed on a JEOL-2100F transmission electron microscope and an internal charge-coupled device (CCD) camera. The specimen for TEM measurement was prepared by spin casting the blend solution on ITO/PEDOT:PSS substrate, then floating the film on a water surface, and transferring to TEM grids.

**Space-charge-limited-current (SCLC) mobility measurement.** The hole-only devices used a diode configuration of ITO/PEDOT:PSS/active layer/MoO<sub>3</sub>/Ag by taking current-voltage curve in the range of 0-6 V. The carrier mobilities were measured using the SCLC model, which is described by  $J = 9\epsilon_0\epsilon_r u V^2 / 8L^3$ , where  $J$  is the current density,  $L$  is the film thickness of active layer,  $\epsilon_0$  is the permittivity of free space ( $8.85 \times 10^{-12} \text{ F m}^{-1}$ ),  $\epsilon_r$  is the relative dielectric

constant of the transport medium,  $\mu$  is the hole or electron mobility,  $V$  is the internal voltage in the device and  $V = V_{\text{app}} - V_r - V_{bi}$ , where  $V_{\text{app}}$  is the applied voltage to the device,  $V_r$  is the voltage drop due to contact resistance and series resistance across the electrodes, and  $V_{bi}$  is the built-in voltage due to the relative work function difference of the two electrodes.<sup>1-3</sup> The thickness of the BHJ blend for SCLC measurement was about 110 nm. The hole-mobility can be calculated from the slope of the  $J^{1/2} \sim V$  curves.

### 3. Supporting Figures and Tables

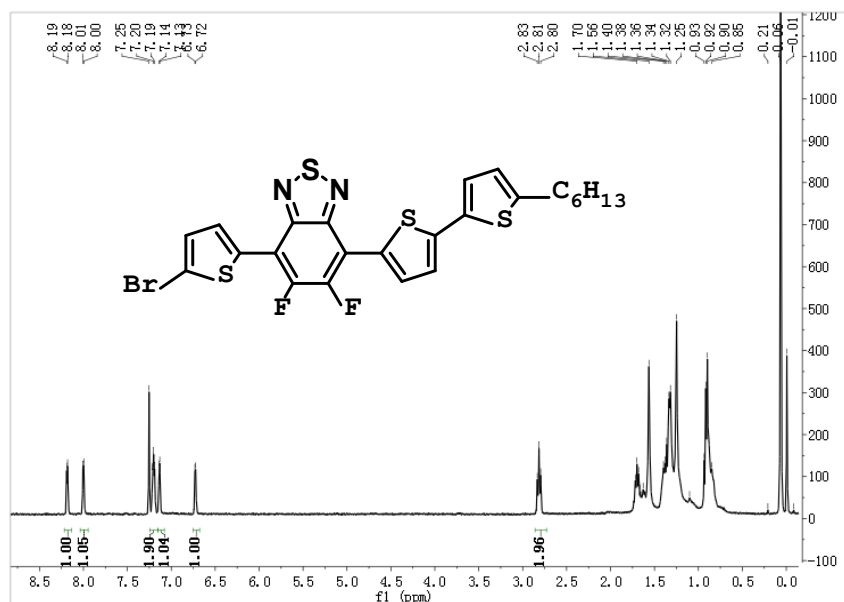

Figure S1. <sup>1</sup>H NMR spectra of compound 4 in CDCl<sub>3</sub>.

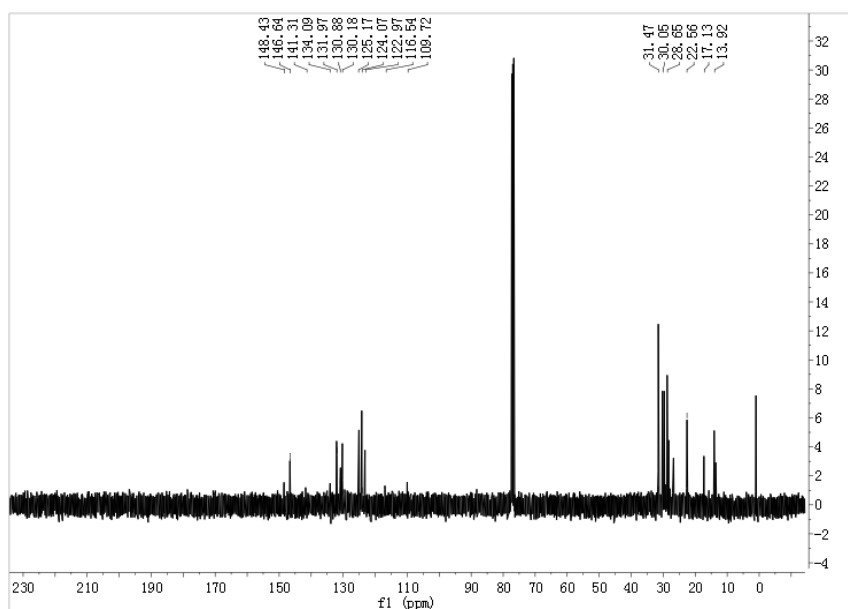

Figure S2. <sup>13</sup>C NMR spectra of compound 4 in CDCl<sub>3</sub>.

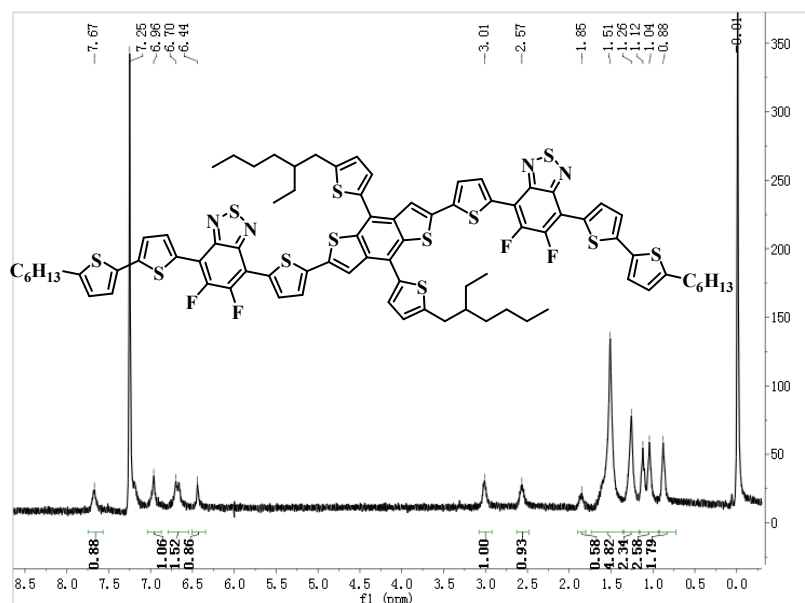

Figure S3.  $^1\text{H NMR}$  spectra of compound  $\text{BDT}(\text{TffBTtT6})_2$  in  $\text{CDCl}_3$ .

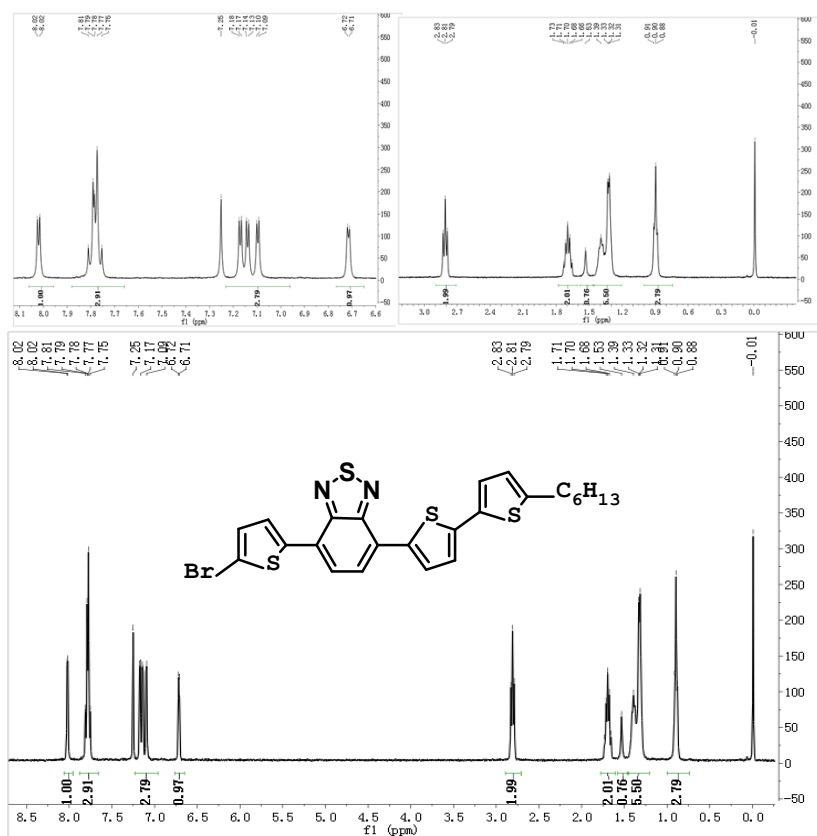

Figure S4.  $^1\text{H NMR}$  spectra of compound 5 in  $\text{CDCl}_3$ .

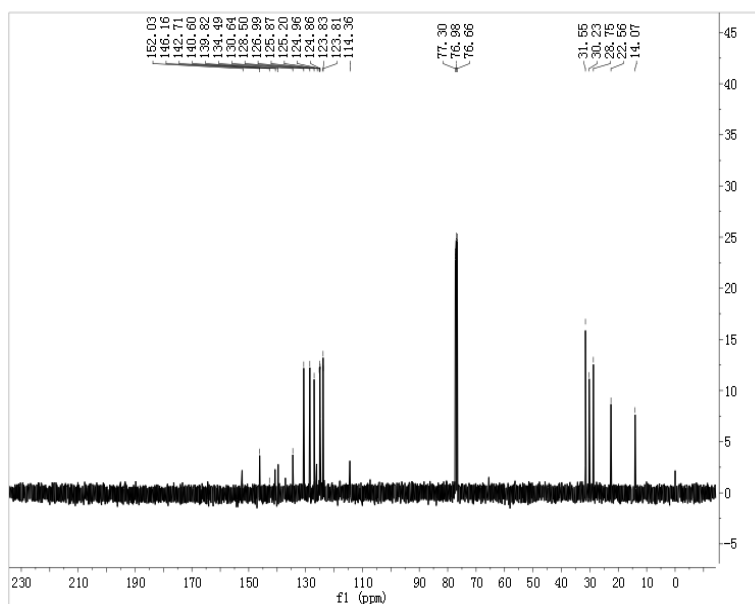

Figure S5.  $^{13}\text{C}$  NMR spectra of compound **5** in  $\text{CDCl}_3$ .

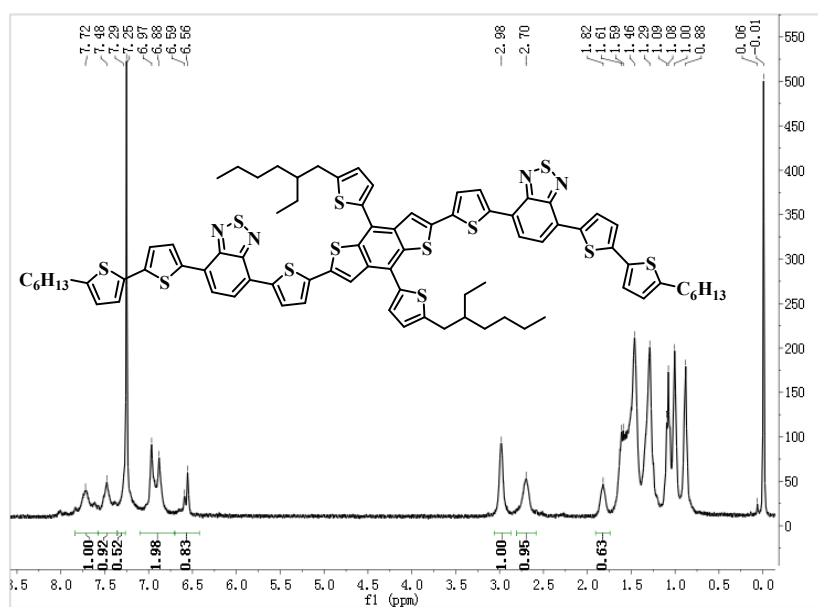

Figure S6.  $^1\text{H}$  NMR spectra of compound **BDT(TBTTT) $_2$**  in  $\text{CDCl}_3$ .

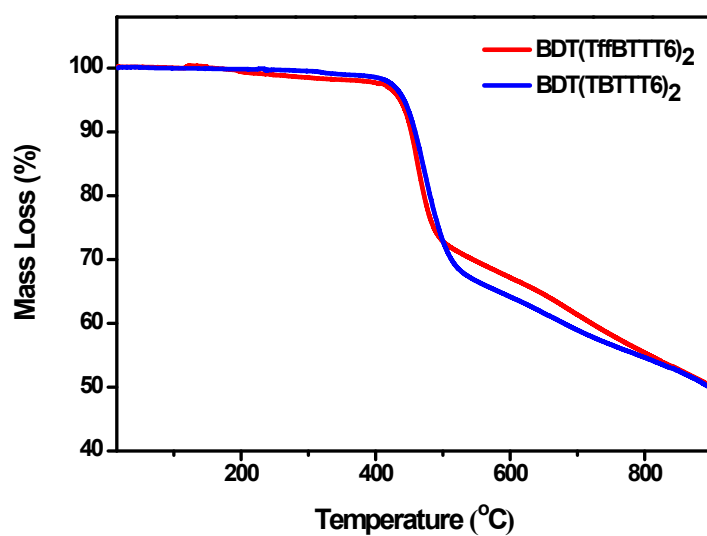

Figure S7. TGA plots of BDT(TffBTTT6)<sub>2</sub> and BDT(TBTtT6)<sub>2</sub> with a heating rate of 10 °C/min under N<sub>2</sub> atmosphere.

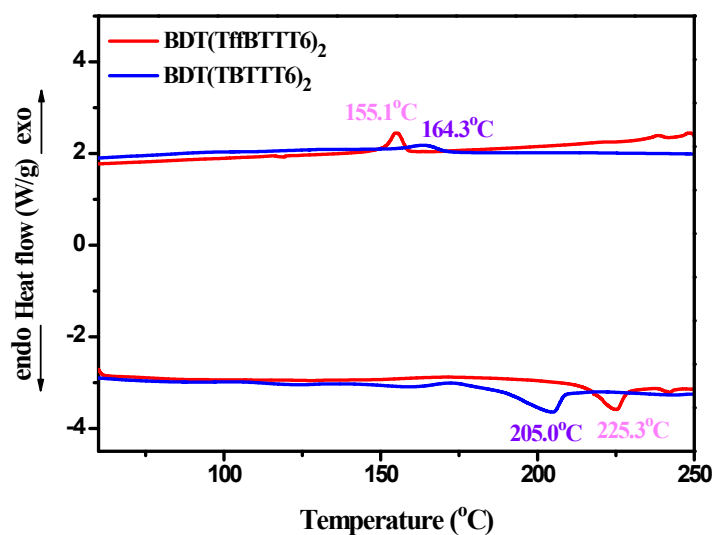

Figure S8. DSC thermograms of BDT(TffBTTT6)<sub>2</sub> and BDT(TBTtT6)<sub>2</sub> with a heating rate of 5 °C/min.

**Table S1.** Photovoltaic performance of BHJ solar cells based on BDT(TffBTTT6)<sub>2</sub>/PC<sub>71</sub>BM with different weight ratios (w:w) cast from CHCl<sub>3</sub> under illumination of AM 1.5 G, 100 mW cm<sup>-2</sup>.

| Ratio of donor and acceptor | V <sub>oc</sub> (V) | J <sub>sc</sub> (mA cm <sup>-2</sup> ) | FF (%) | PCE (%) |
|-----------------------------|---------------------|----------------------------------------|--------|---------|
| 1:1.5                       | 0.71                | 1.84                                   | 61.1   | 0.8     |
| 1:1                         | 0.72                | 1.56                                   | 57.8   | 0.7     |
| 1:0.8                       | 0.73                | 2.97                                   | 59.8   | 1.3     |
| 1.5:1                       | 0.73                | 2.83                                   | 58.5   | 1.2     |

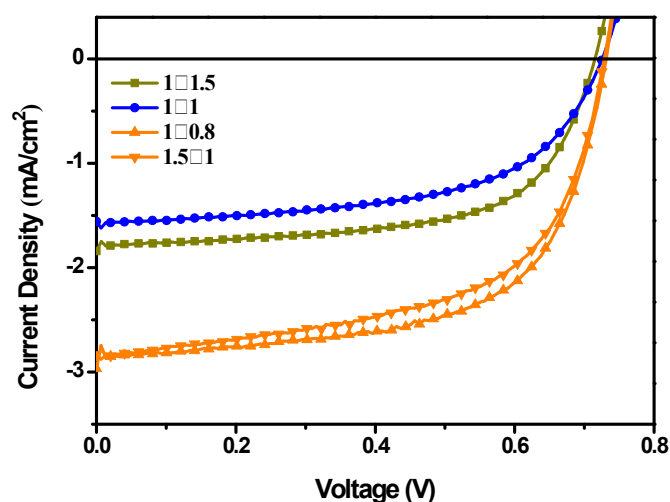

**Figure S9.** J-V curves of BHJ solar cells based on BDT(TffBTTT6)<sub>2</sub>/PC<sub>71</sub>BM with different weight ratios (w/w) cast from CHCl<sub>3</sub> under illumination of AM 1.5 G, 100 mW cm<sup>-2</sup>.

**Table S2.** Photovoltaic performance of BHJ solar cells based on BDT(TffBTTT6)<sub>2</sub>/PC<sub>61</sub>BM and BDT(TBTTT6)<sub>2</sub>/PC<sub>71</sub>BM with weight ratio at 1:0.8 cast from CHCl<sub>3</sub> with thermal annealing at different temperature for 10 min under illumination of AM 1.5 G, 100 mW cm<sup>-2</sup>.

| active layer                                        | Temperature (°C) | V <sub>oc</sub> (V) | J <sub>sc</sub> (mA cm <sup>-2</sup> ) | FF (%) | PCE (%) |
|-----------------------------------------------------|------------------|---------------------|----------------------------------------|--------|---------|
| BDT(TffBTTT6) <sub>2</sub> /<br>PC <sub>61</sub> BM | No               | 0.8                 | 3.79                                   | 58.0   | 1.76    |
|                                                     | 70               | 0.82                | 4.09                                   | 59.5   | 2.0     |
|                                                     | 100              | 0.83                | 4.32                                   | 60.5   | 2.17    |
|                                                     | 160              | 0.80                | 5.77                                   | 56.1   | 2.59    |
| BDT(TBTTT6) <sub>2</sub> /<br>PC <sub>71</sub> BM   | No               | 0.72                | 4.77                                   | 37.9   | 1.3     |
|                                                     | 70               | 0.67                | 6.19                                   | 37.0   | 1.53    |
|                                                     | 100              | 0.68                | 6.98                                   | 38.0   | 1.8     |
|                                                     | 170              | 0.79                | 3.13                                   | 34.7   | 0.86    |

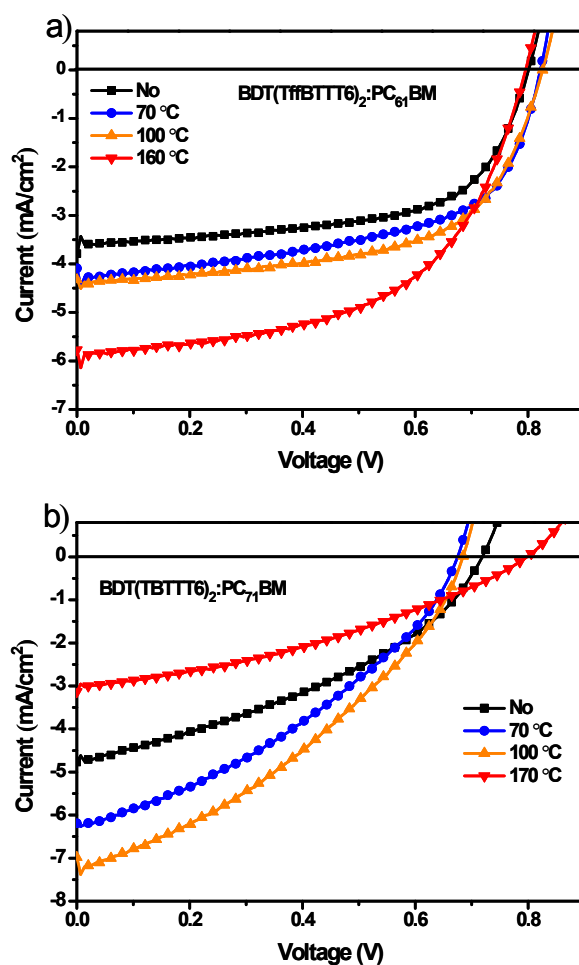

**Figure S10.** *J-V* curves of BHJ solar cells based on (a) BDT(TffBTTT6)<sub>2</sub>/PC<sub>61</sub>BM and (b) BDT(TBT6)<sub>2</sub>/PC<sub>71</sub>BM with weight ratio at 1:0.8 cast from CHCl<sub>3</sub> with thermal annealing at different temperature for 10 min under illumination of AM 1.5 G, 100 mW cm<sup>-2</sup>.

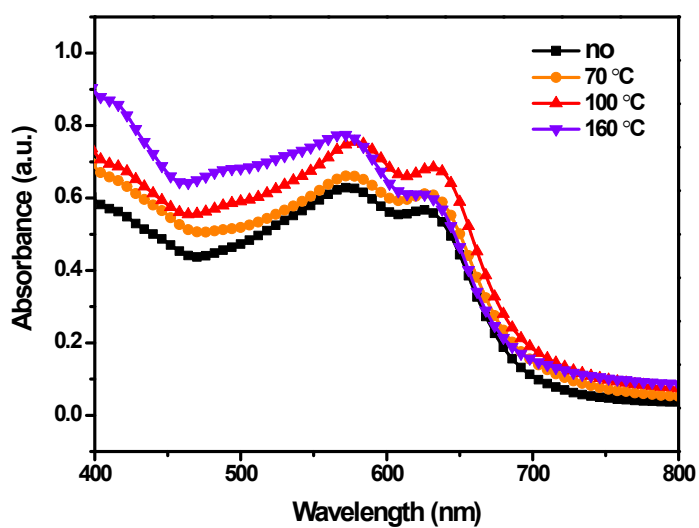

**Figure S11.** UV-vis absorption spectra of BDT(TffBTTT6)<sub>2</sub>/PC<sub>61</sub>BM blend film with thermal annealing for 10 min.

**Table S3.** Photovoltaic performance of BHJ solar cells based on BDT(TffBTTT6)<sub>2</sub>/PC<sub>61</sub>BM and BDT(TBTtT6)<sub>2</sub>/PC<sub>71</sub>BM with weight ratio at 1:0.8 cast from CHCl<sub>3</sub> with different volume ratios (v/v) of DIO under illumination of AM 1.5 G, 100 mW cm<sup>-2</sup>.

| active layer                                        | DIO (%) | V <sub>oc</sub> (V) | J <sub>sc</sub> (mA cm <sup>-2</sup> ) | FF (%) | PCE (%) |
|-----------------------------------------------------|---------|---------------------|----------------------------------------|--------|---------|
| BDT(TffBTTT6) <sub>2</sub> /<br>PC <sub>61</sub> BM | No      | 0.8                 | 3.79                                   | 58.0   | 1.76    |
|                                                     | 0.5     | 0.73                | 6.86                                   | 62.2   | 3.11    |
|                                                     | 1.0     | 0.72                | 5.82                                   | 59.8   | 2.51    |
|                                                     | 2.0     | 0.68                | 5.53                                   | 46.1   | 1.73    |
| BDT(TBTtT6) <sub>2</sub> /<br>PC <sub>71</sub> BM   | No      | 0.72                | 4.77                                   | 37.9   | 1.3     |
|                                                     | 0.5     | 0.71                | 7.90                                   | 50.3   | 2.82    |
|                                                     | 1.0     | 0.62                | 7.06                                   | 47.7   | 2.09    |
|                                                     | 2.0     | 0.61                | 5.53                                   | 39.2   | 1.32    |

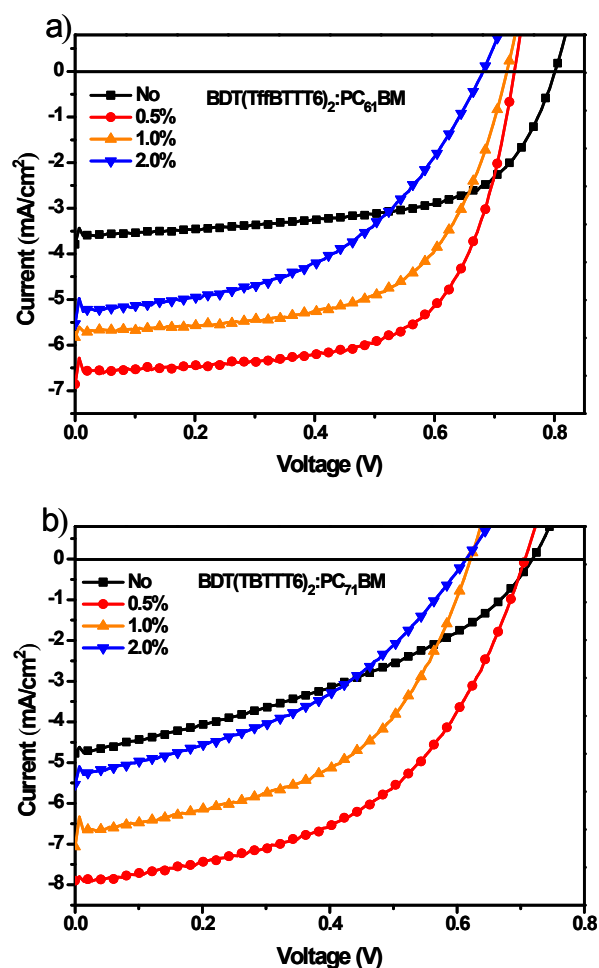

**Figure S12.** *J-V* curves of BHJ solar cells based on (a) BDT(TffBTTT6)<sub>2</sub>/PC<sub>61</sub>BM and (b) BDT(TBTtT6)<sub>2</sub>/PC<sub>71</sub>BM with weight ratio at 1:0.8 cast from CHCl<sub>3</sub> with different volume ratios (v/v) of DIO under illumination of AM 1.5 G, 100 mW cm<sup>-2</sup>.

**Table S4.** Photovoltaic performance of BHJ solar cells based on BDT(TffBTTT6)<sub>2</sub>/PC<sub>61</sub>BM and



BDT(TbTTT6)<sub>2</sub>/PC<sub>71</sub>BM with weight ratio at 1:0.8 cast from CHCl<sub>3</sub> with 0.5 (v/v)% DIO and thermal annealing at different temperature for 10 min under illumination of AM 1.5 G, 100 mW cm<sup>-2</sup>.

| active layer                                        | Temperature (°C) | V <sub>oc</sub> (V) | J <sub>sc</sub> (mA cm <sup>-2</sup> ) | FF (%) | PCE (%) |
|-----------------------------------------------------|------------------|---------------------|----------------------------------------|--------|---------|
| BDT(TffBTTT6) <sub>2</sub> /<br>PC <sub>61</sub> BM | No               | 0.73                | 6.86                                   | 62.2   | 3.11    |
|                                                     | 70               | 0.73                | 9.13                                   | 62.5   | 4.17    |
|                                                     | 100              | 0.67                | 7.16                                   | 56.3   | 2.7     |
|                                                     | 160              | 0.67                | 5.88                                   | 40.0   | 1.58    |
| BDT(TbTTT6) <sub>2</sub> /<br>PC <sub>71</sub> BM   | No               | 0.71                | 7.90                                   | 50.3   | 2.82    |
|                                                     | 70               | 0.71                | 8.42                                   | 53.0   | 3.17    |
|                                                     | 100              | 0.64                | 6.22                                   | 49.5   | 1.97    |
|                                                     | 170              | 0.59                | 3.69                                   | 35.5   | 0.77    |

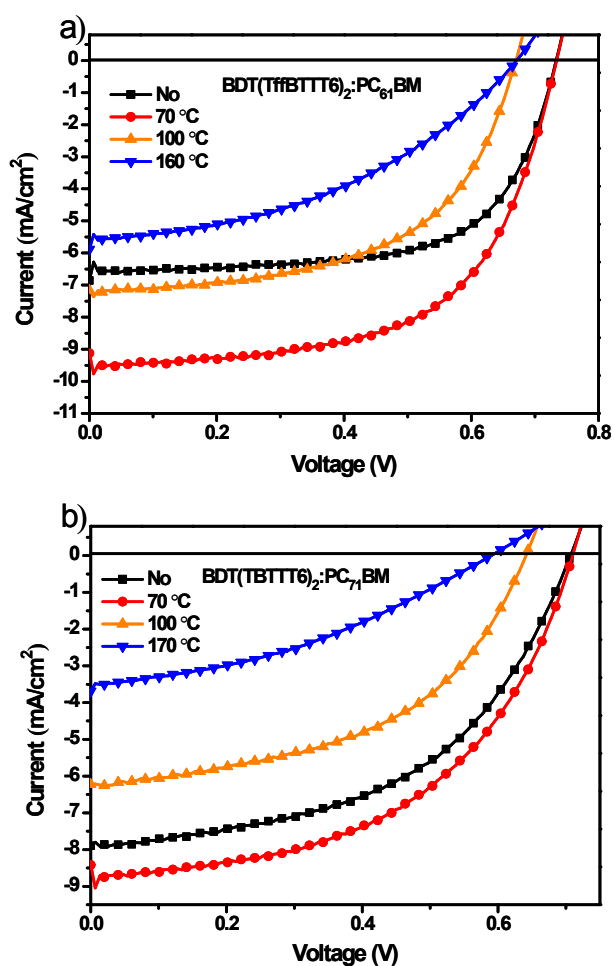

**Figure S13.** *J-V* curves of BHJ solar cells based on (a) BDT(TffBTTT6)<sub>2</sub>/PC<sub>61</sub>BM and (b) BDT(TbTTT6)<sub>2</sub>/PC<sub>71</sub>BM with weight ratio at 1:0.8 cast from CHCl<sub>3</sub> with 0.5 (v/v)% DIO and thermal annealing at different temperature for 10 min under illumination of AM 1.5 G, 100 mW cm<sup>-2</sup>.

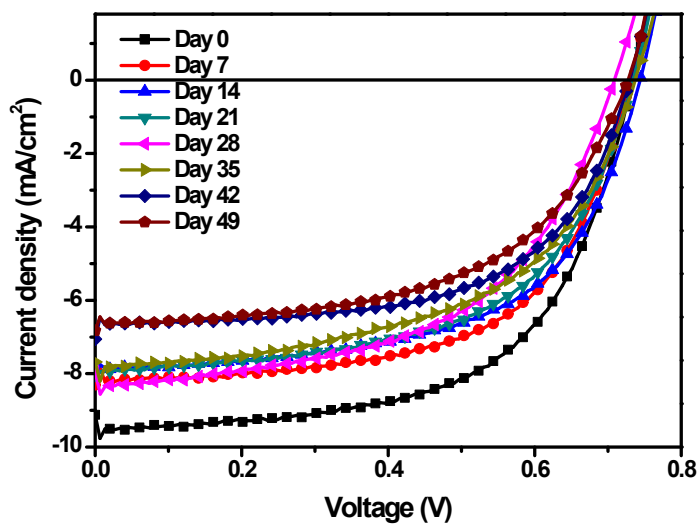

**Figure S14.** The  $J$ - $V$  characteristics of this long-term stable device as a function of time for the devices: ITO/ZnO/BDT(TffBTTT6)<sub>2</sub>:PC<sub>61</sub>BM /MoO<sub>3</sub>/Ag at glovebox.

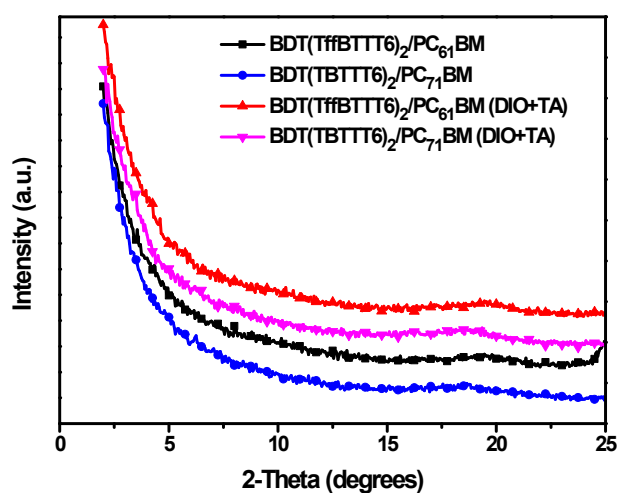

**Figure S15.** in-plane grazing incident X-ray diffraction (GIXRD) measurement of BDT(TffBTTT6)<sub>2</sub>/PC<sub>61</sub>BM and BDT(TBTtTT6)<sub>2</sub>/PC<sub>71</sub>BM film with or without 0.5 v/v% DIO and 70 °C annealing (TA).

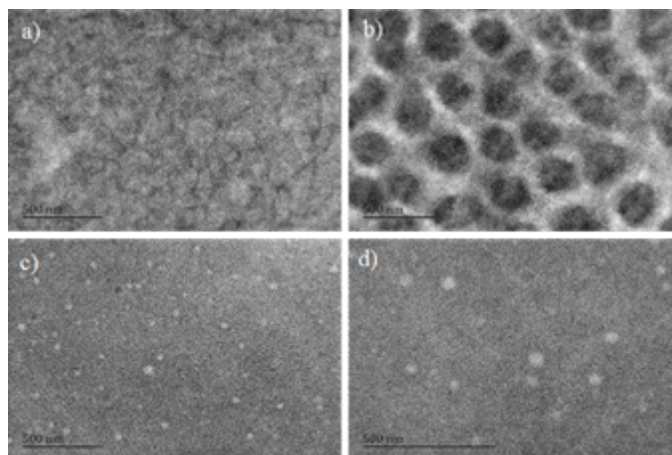

**Figure S16.** TEM images of the active layers with (a) BDT(TffBTTT6)<sub>2</sub>/PC<sub>61</sub>BM, (b) BDT(TffBTTT6)<sub>2</sub>:PC<sub>71</sub>BM, (c) BDT(TBTTT6)<sub>2</sub>/PC<sub>61</sub>BM, (d) BDT(TBTTT6)<sub>2</sub>/PC<sub>71</sub>BM.

## References

- 1 H. C. Chen, C. W. Lai, I. C. Wu, H. R. Pan, I. Chen, P. Wen, Y. K. Peng, C. L. Liu, C. h. Chen, P. T. Chou, *Adv. Mater.* **2011**, *23*, 5451-5455.
- 2 Y. J. Cheng, C. H. Hsieh, P. J. Li, C. S. Hsu, *Adv. Funct. Mater.* **2011**, *21*, 1723-1732.
- 3 Y. Liu, X. Wan, F. Wang, J. Zhou, G. Long, J. Tian, Y. Chen, *Adv. Mater.* **2011**, *23*, 5387-5391.
